# Supplementary material
Source: publisher figshare collection journal article supplement (https://sage.figshare.com/ndownloader/files/15564107)

**Supplemental Table 1: Demographic questions for teacher participants**

|                                                                                               |                                                        | Controls    |             | Interventions |               | p-value                         |
|-----------------------------------------------------------------------------------------------|--------------------------------------------------------|-------------|-------------|---------------|---------------|---------------------------------|
|                                                                                               |                                                        | Pre         | Post        | Pre           | Post          | Controls v Interventions at Pre |
| All Teachers N=475                                                                            |                                                        | 73          | 73          | 302           | 285           |                                 |
| Do you know anyone with food allergy?                                                         |                                                        | 61 (84%)    | 59 (81%)    | 258/293 (88%) | 236/269 (88%) | 0.25                            |
| Who has the Food Allergy                                                                      |                                                        |             |             |               |               |                                 |
|                                                                                               | Me                                                     | 5/61 (8%)   | 5/57 (9%)   | 42/279 (15%)  | 35/245 (14%)  | 0.09                            |
|                                                                                               | Child                                                  | 10/61 (16%) | 10/57 (18%) | 68/279 (24%)  | 47/245 (19%)  | 0.08                            |
|                                                                                               | Spouse/Partner                                         | 2/61 (3%)   | 1/57 (2%)   | 15/279 (5%)   | 12/245 (5%)   | 0.33                            |
|                                                                                               | Friend/Relative                                        | 31/61 (51%) | 28/57 (49%) | 129/279 (46%) | 119/245 (49%) | 0.69                            |
|                                                                                               | Child's classmate/friend                               | 9/61 (15%)  | 12/57 (21%) | 59/279 (21%)  | 55/245 (22%)  | <b>&lt;0.01</b>                 |
| Does your child have a current food allergy that has been diagnosed by a doctor?              |                                                        | 0           | 0           | 0             | 0             | --                              |
| Are you a pediatrician or family practitioner?                                                |                                                        | 4/21 (19%)  | 2/16 (13%)  | 8/211 (4%)    | 2/160 (1%)    | 0.08                            |
| Which of the following do you think is the most important to help people with food allergies? |                                                        |             |             |               |               | 0.12                            |
|                                                                                               | 1) Develop a cure for food allergy.                    | 9 (13%)     | 14 (20%)    | 32 (11%)      | 26 (10%)      |                                 |
|                                                                                               | 2) Improve the treatment of food allergy.              | 9 (13%)     | 4 (6%)      | 18 (6%)       | 10 (4%)       |                                 |
|                                                                                               | 3) Find the causes of food allergy.                    | 12 (18%)    | 15 (21%)    | 75 (26%)      | 36 (13%)      |                                 |
|                                                                                               | 4) Promote school education programs for food allergy. | 7 (10%)     | 14 (20%)    | 60 (20%)      | 92 (34%)      |                                 |
|                                                                                               | 5) Promote public awareness campaigns for food allergy | 23 (34%)    | 21 (30%)    | 80 (27%)      | 90 (33%)      |                                 |
|                                                                                               | No response                                            | 3 (4%)      | 2 (3%)      | 4 (1%)        | 6 (2%)        |                                 |
|                                                                                               | Multiple responses *                                   | 5 (7%)      | 1 (1%)      | 25 (27%)      | 12 (4%)       |                                 |
| Which would be the best way to learn about food allergy? Mark one answer:                     |                                                        |             |             |               |               | <b>&lt;0.01</b>                 |
|                                                                                               | 1) Radio                                               | 1 (1%)      | 2 (3%)      | 2 (1%)        | 2 (1%)        |                                 |
|                                                                                               | 2) TV                                                  | 21 (31%)    | 18 (25%)    | 89 (30%)      | 77 (28%)      |                                 |
|                                                                                               | 3) Handout/brochure                                    | 17 (25%)    | 21 (30%)    | 41 (14%)      | 43 (16%)      |                                 |
|                                                                                               | 4) Internet/Email                                      | 16 (24%)    | 19 (27%)    | 91 (31%)      | 76 (28%)      |                                 |
|                                                                                               | 5) Newspapers/Magazines                                | 2 (3%)      | 1 (1%)      | 14 (5%)       | 7 (3%)        |                                 |
|                                                                                               | 6) Other                                               | 5 (7%)      | 7 (10%)     | 37 (13%)      | 46 (17%)      |                                 |
|                                                                                               | Multiple Responses **                                  | 4 (6%)      | 1 (1%)      | 11 (4%)       | 14 (5%)       |                                 |
|                                                                                               | No Response                                            | 2 (3%)      | 2 (3%)      | 8 (3%)        | 7 (3%)        |                                 |

**Supplemental Table 1: Demographic questions for teacher participants**

|                                                                                                                                   |                                                               |             |             |               |               |                 |
|-----------------------------------------------------------------------------------------------------------------------------------|---------------------------------------------------------------|-------------|-------------|---------------|---------------|-----------------|
| Do you have children under the age of 18? Yes                                                                                     |                                                               | 26 (38%)    | 28 (39%)    | 99 (34%)      | 89 (33%)      | 0.60            |
| Do your children attend any of the following?                                                                                     |                                                               |             |             |               |               | <b>&lt;0.01</b> |
|                                                                                                                                   | No Children                                                   | 0           | 0           | 14 (5%)       | 12 (5%)       |                 |
|                                                                                                                                   | No Children in school                                         | 2 (7%)      | 2 (6%)      | 15 (6%)       | 11 (5%)       |                 |
|                                                                                                                                   | Preschool                                                     | 1 (4%)      | 4 (13%)     | 18 (7%)       | 16 (7%)       |                 |
|                                                                                                                                   | Elementary                                                    | 4 (14%)     | 4 (13%)     | 18 (7%)       | 18 (8%)       |                 |
|                                                                                                                                   | Middle School                                                 | 4 (14%)     | 3 (10%)     | 8 (3%)        | 8 (3%)        |                 |
|                                                                                                                                   | High School                                                   | 3 (11%)     | 3 (10%)     | 19 (7%)       | 17 (7%)       |                 |
|                                                                                                                                   | Multiple Schools                                              | 11 (39%)    | 11 (35%)    | 31 (12%)      | 29 (12%)      |                 |
|                                                                                                                                   | No Response                                                   | 3 (11%)     | 4 (13%)     | 135 (52%)     | 126 (53%)     |                 |
| What would be the best way for schools to teach parents about how to protect children with food allergies? Mark ONE answer. N=226 |                                                               |             |             |               |               | <b>0.02</b>     |
|                                                                                                                                   | 1) Handouts and brochures in the mail                         | 9 (13%)     | 7 (10%)     | 10 (4%)       | 8 (3%)        |                 |
|                                                                                                                                   | 2) Presentation at parent-teacher meetings                    | 18 (26%)    | 24 (34%)    | 81 (32%)      | 83 (35%)      |                 |
|                                                                                                                                   | 3) Parents of food allergic children talking to other parents | 6 (9%)      | 8 (11%)     | 18 (7%)       | 12 (5%)       |                 |
|                                                                                                                                   | 4) Doctor or nurse talking about food allergies               | 14 (21%)    | 18 (25%)    | 48 (19%)      | 42 (18%)      |                 |
|                                                                                                                                   | 5) Other                                                      | 3 (4%)      | 1 (1%)      | 9 (4%)        | 6 (2%)        |                 |
|                                                                                                                                   | Multiple Responses                                            | 5 (7%)      | 1 (1%)      | 11 (4%)       | 12 (5%)       |                 |
|                                                                                                                                   | No response                                                   | 13 (19%)    | 12 (17%)    | 77 (30%)      | 72 (31%)      |                 |
| How old are you?                                                                                                                  |                                                               |             |             |               |               | <b>0.04</b>     |
|                                                                                                                                   | 18-24                                                         | 1/71 (1%)   | 1/71 (1%)   | 9/294 (3%)    | 12/272 (4%)   |                 |
|                                                                                                                                   | 25-44                                                         | 26/71 (37%) | 27/71 (38%) | 121/294 (41%) | 105/272 (39%) |                 |
|                                                                                                                                   | 45-65                                                         | 39/71 (55%) | 38/71 (54%) | 144/294 (49%) | 129/272 (47%) |                 |
|                                                                                                                                   | Over 65                                                       | 0           | 0           | 16/294 (5%)   | 16/272 (6%)   |                 |
|                                                                                                                                   | No response                                                   | 5/71 (7%)   | 5/71 (7%)   | 4/294 (1%)    | 10/272 (4%)   |                 |
| What is your gender                                                                                                               |                                                               |             |             |               |               | <b>0.05</b>     |
|                                                                                                                                   | Female                                                        | 64/71 (90%) | 61/71 (86%) | 249/294 (85%) | 218/272 (80%) |                 |
|                                                                                                                                   | Male                                                          | 3/71 (4%)   | 2/71 (3%)   | 38/294 (13%)  | 29/272 (11%)  |                 |
|                                                                                                                                   | No response                                                   | 4/71 (6%)   | 8/71 (11%)  | 7/294 (2%)    | 25/272 (9%)   |                 |
| What is your race/ ethnicity? Mark all that apply.                                                                                |                                                               |             |             |               |               | <b>0.39</b>     |
|                                                                                                                                   | White                                                         | 57/71 (80%) | 55/71 (77%) | 237/294 (81%) | 218/272 (80%) |                 |
|                                                                                                                                   | African American                                              | 1/71 (1%)   | 1/71 (1%)   | 13/294 (4%)   | 12/272 (4%)   |                 |
|                                                                                                                                   | Hispanic/Latino                                               | 5/71 (7%)   | 6/71 (8%)   | 27/294 (9%)   | 22/272 (8%)   |                 |
|                                                                                                                                   | Asian                                                         | 1/71 (1%)   | 1/71 (1%)   | 1/294 (0.3%)  | 1/272 (0.4%)  |                 |

**Supplemental Table 1: Demographic questions for teacher participants**

|                                                                                                                                                         |                |                |                  |                  |      |
|---------------------------------------------------------------------------------------------------------------------------------------------------------|----------------|----------------|------------------|------------------|------|
| Other                                                                                                                                                   | 1/71<br>(1%)   | 1/71<br>(1%)   | 2/294<br>(1%)    | 2/272<br>(1%)    |      |
| Multiracial                                                                                                                                             | 1/71<br>(1%)   | 1/71<br>(1%)   | 6/294<br>(2%)    | 5/272<br>(2%)    |      |
| No response                                                                                                                                             | 5/71<br>(7%)   | 6/71<br>(8%)   | 8/294<br>(3%)    | 12/272<br>(4%)   |      |
| What is the highest education level you have completed?                                                                                                 |                |                |                  |                  | 0.33 |
| Less than High School                                                                                                                                   | 0              | 0              | 2/294<br>(1%)    | 2/272<br>(1%)    |      |
| High School                                                                                                                                             | 7/71<br>(10%)  | 6/71<br>(8%)   | 14/294<br>(5%)   | 13/272<br>(5%)   |      |
| 2 year college                                                                                                                                          | 3/71<br>(4%)   | 3/71<br>(4%)   | 14/294<br>(5%)   | 12/272<br>(4%)   |      |
| 4 year college                                                                                                                                          | 37/71<br>(52%) | 37/71<br>(52%) | 136/294<br>(46%) | 117/272<br>(43%) |      |
| Graduate degree                                                                                                                                         | 21/71<br>(30%) | 20/71<br>(28%) | 120/294<br>(41%) | 114/272<br>(42%) |      |
| No response                                                                                                                                             | 3/71<br>(4%)   | 5/71<br>(7%)   | 8/294<br>(3%)    | 14/272<br>(5%)   |      |
| Which of the following categories best represents the combined income for all the family members in your household for the past 12 months before taxes? |                |                |                  |                  | 0.51 |
| 1) < 25,000                                                                                                                                             | 0              | 0              | 5/294<br>(2%)    | 3/272<br>(1%)    |      |
| 2) 25,000-49,999                                                                                                                                        | 7/71<br>(10%)  | 8/71<br>(11%)  | 27/294<br>(9%)   | 26/272<br>(10%)  |      |
| 3) 50,000-74,999                                                                                                                                        | 13/71<br>(18%) | 10/71<br>(14%) | 51/294<br>(17%)  | 45/272<br>(17%)  |      |
| 4) 75,000-99,999                                                                                                                                        | 11/71<br>(15%) | 15/71<br>(21%) | 39/294<br>(13%)  | 35/272<br>(13%)  |      |
| 5) 100,000-149,000                                                                                                                                      | 5/71<br>(7%)   | 5/71<br>(7%)   | 47/294<br>(16%)  | 39/272<br>(14%)  |      |
| 6) 150,000 or greater                                                                                                                                   | 19/71<br>(27%) | 19/71<br>(27%) | 68/294<br>(23%)  | 66/272<br>(24%)  |      |
| No response                                                                                                                                             | 16/71<br>(23%) | 14/71<br>(20%) | 57/294<br>(19%)  | 58/272<br>(21%)  |      |
| Have you had any experience or training with food allergy through your job or work? Yes                                                                 |                |                |                  |                  | 0.13 |
|                                                                                                                                                         | 53/71<br>(75%) | 46/71<br>(65%) | 184/294<br>(63%) | 232/272<br>(85%) |      |

\* Multiple Responses: Pre – controls (n=5): 3,5 ; 4,5 ; 2,3 ; 2,4,5 ; 3,4,5

Post-controls: (n=1) 1,4

Pre-Intervention: (n=25) 1,2;1-5 (4 responses);1,4;2,3 (2 responses);2-5;2,4;3,4;3,5;3-5(2 responses);4,5 (11 responses)

Post intervention: (n=6) 1-5 ; 2,4;2,4,5;2,5;3,4;3-5(2 responses);4,5 (5 responses)

\*\* Multiple Responses: Pre control (n=4): 1,2 ; 2,4 ; 3,4 ; 4,5

Post control (n=1): 4,5

Pre intervention (n=11): 1-6; 2,4; 1,2,4; 2,3; 2-5; 2,4,5; 3,4 (2 responses);3,5(2 responses);4,6

Post intervention (n=14): 1,2 (3 responses); 1,2,4; 1,3,5; 2-5; 2,6; 3,4 (2 responses);3,5 ; 4,5; 4,6 (3 responses)

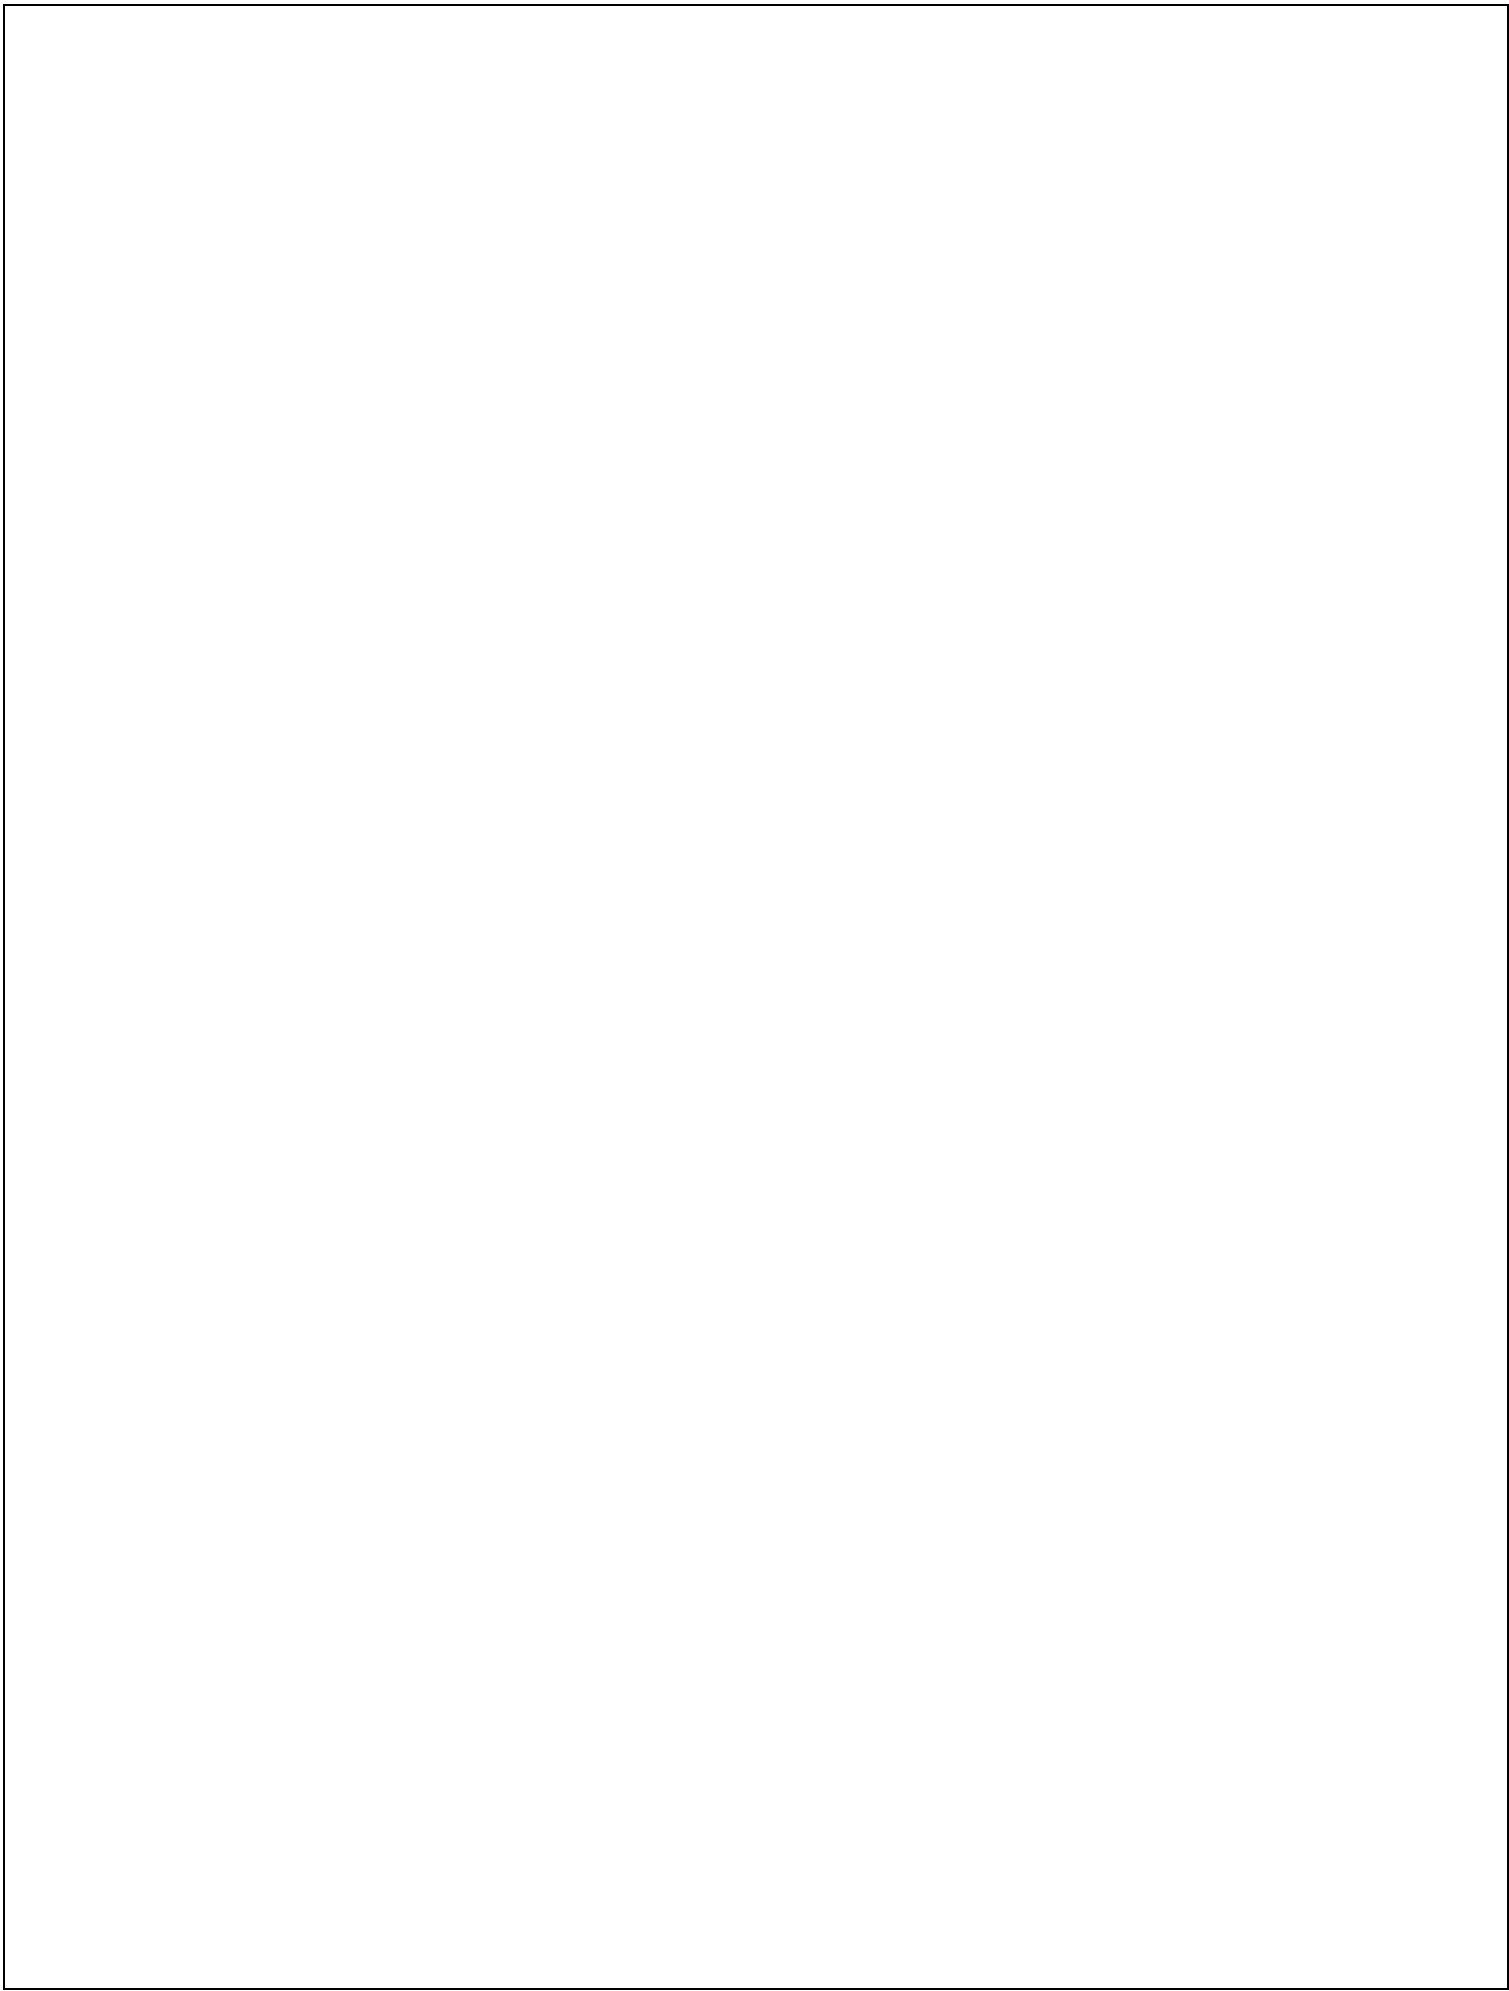



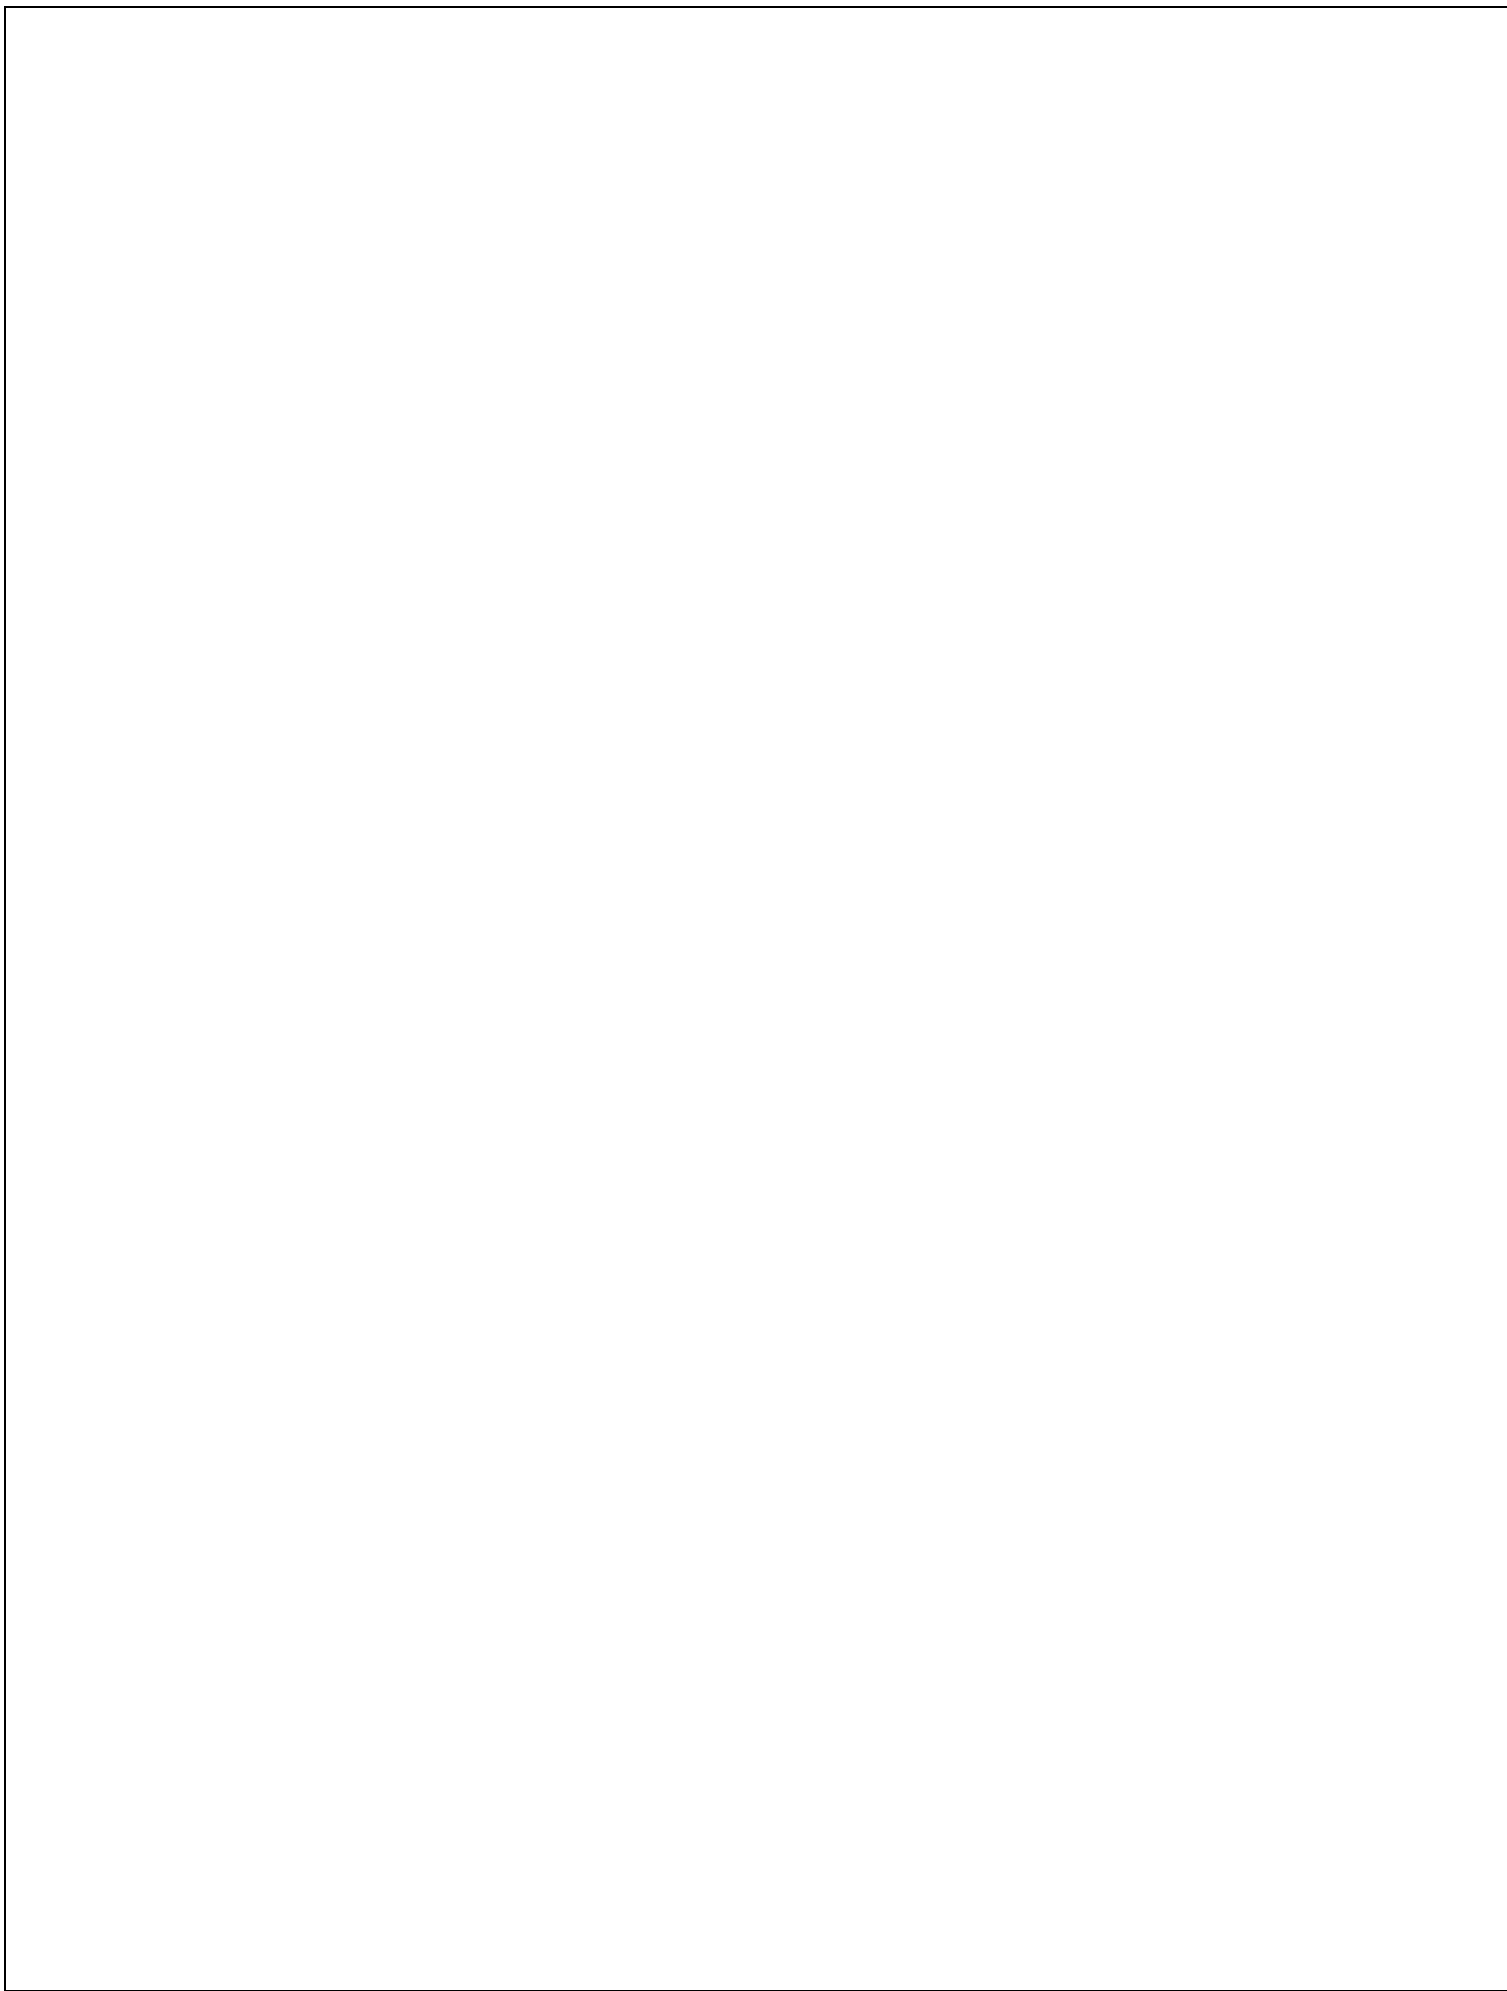

Supplement: Supplementary file 1 [file 15564107]
